# Supplementary material for: Analysis of the Coptis chinensis genome reveals the diversification of protoberberine-type alkaloids
Source: PubMed Central journal article supplement (PMC8172641; doi:10.1038/s41467-021-23611-0), 2021-06-02
Supplement: 41467_2021_23611_MOESM1_ESM.pdf [file 41467_2021_23611_MOESM1_ESM.pdf]

**Analysis of the *Coptis chinensis* genome reveals the diversification of protoberberine-type alkaloids**

Liu *et al.*

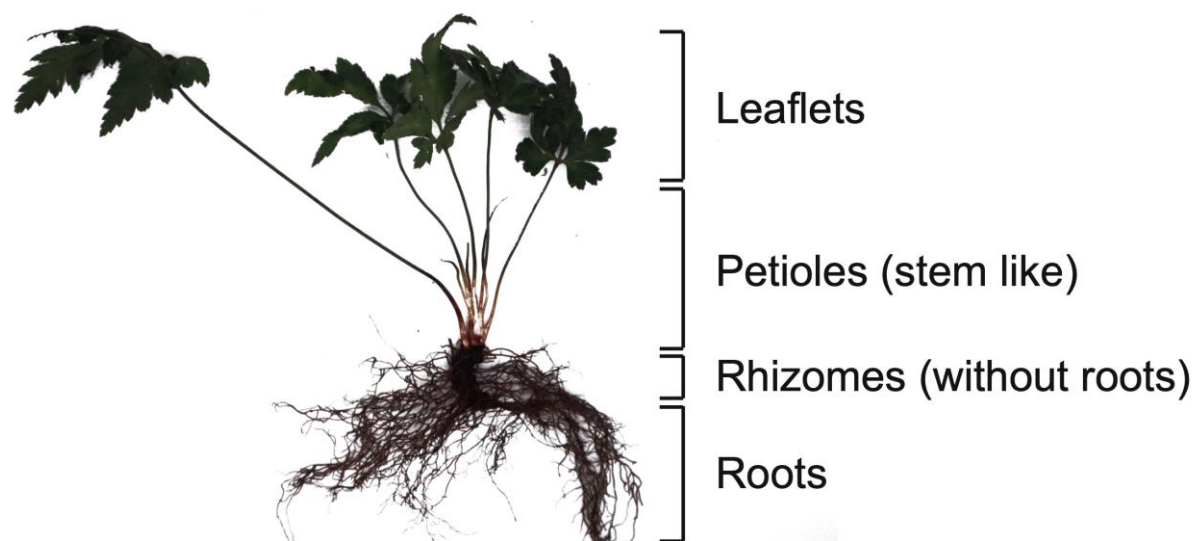

**Supplementary Fig. 1. A plant of *Coptis chinensis*.** It was collected from Lichuan, Hubei Province, China. Four tissues were marked for both transcriptomic and metabolic analyses.

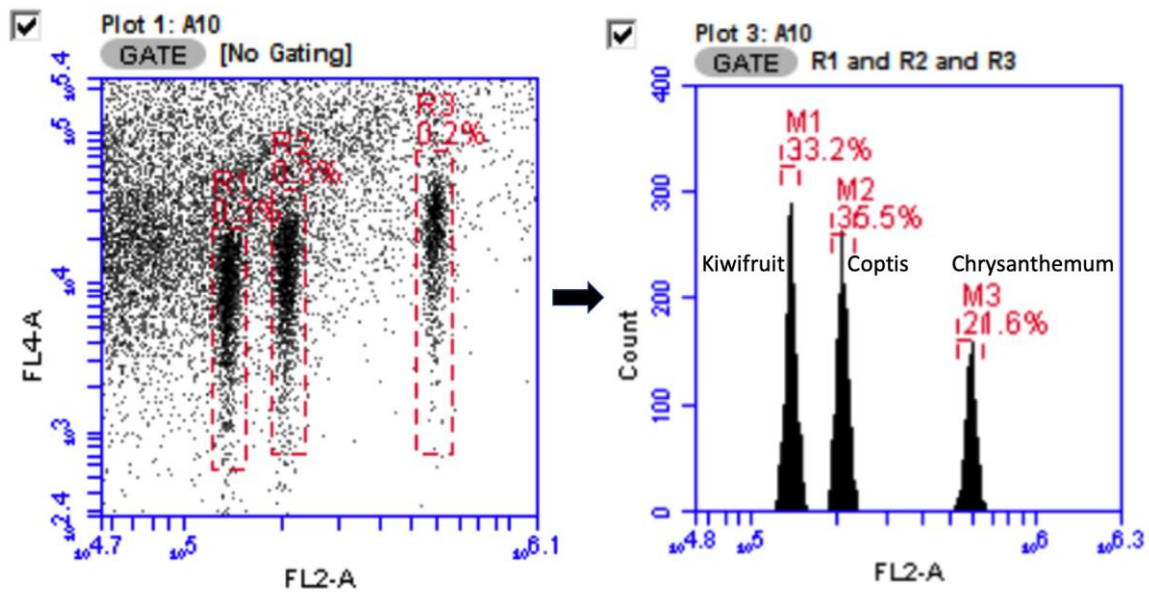

**Supplementary Fig. 2. Estimate of the genome size of *Coptis chinensis* on a BD Accuri™ C6 flow cytometry.** Both diploid kiwifruit (*Actinidia chinensis*) and *Chrysanthemum nankingense* were used as inner standards. On an FL2 vs FL4 plot, nuclear events cluster for three samples (left) and gating on these events with FL2 fluorescence shows clear peaks corresponding to species genome size (right).

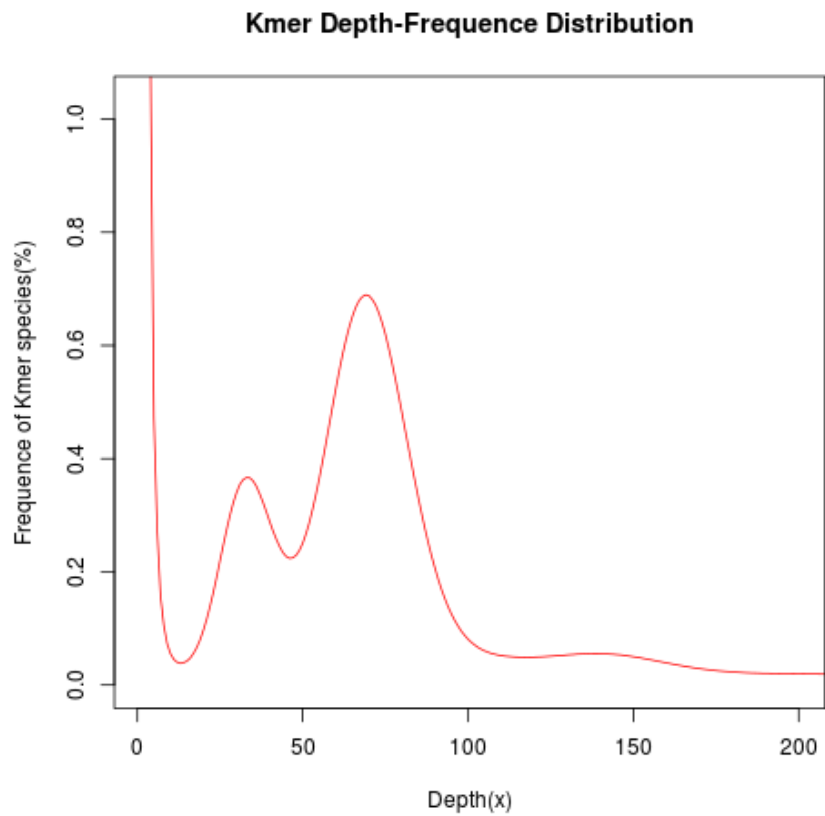

**Supplementary Fig. 3. 19-mer depth distribution of the *Coptis chinensis* genome sequencing reads.** Two peaks were observed indicating heterozygosity in this species.

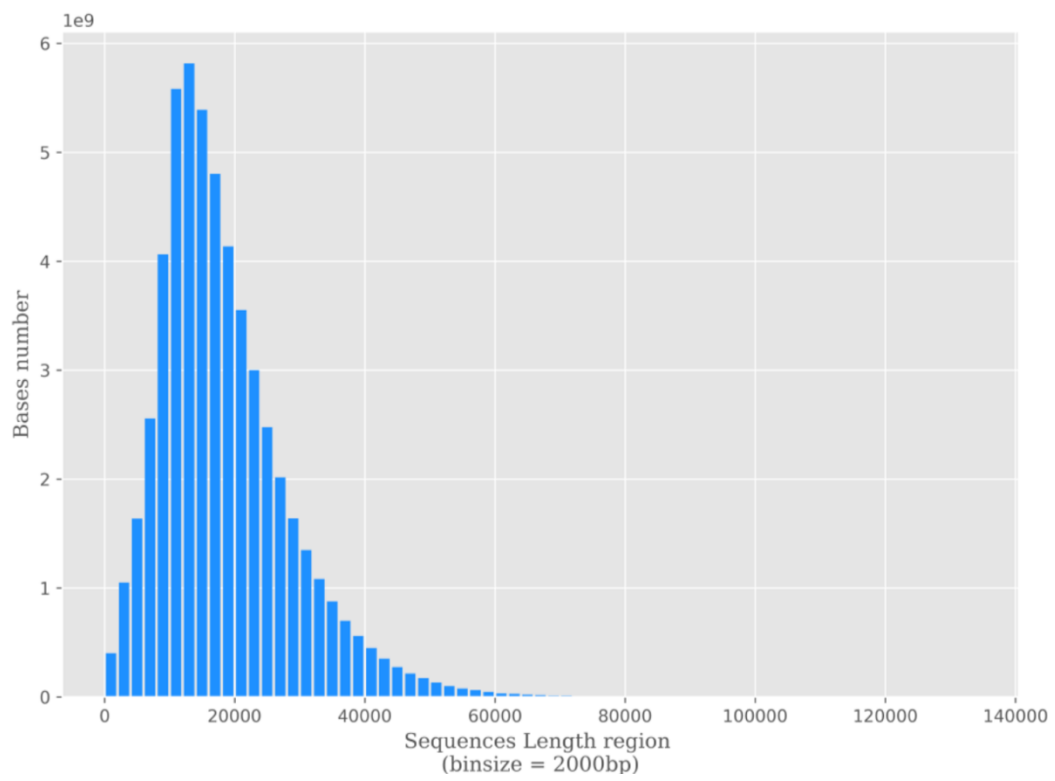

**Supplementary Fig. 4. Length distribution of nanopore long reads produced from the *Coptis chinensis* sample.**

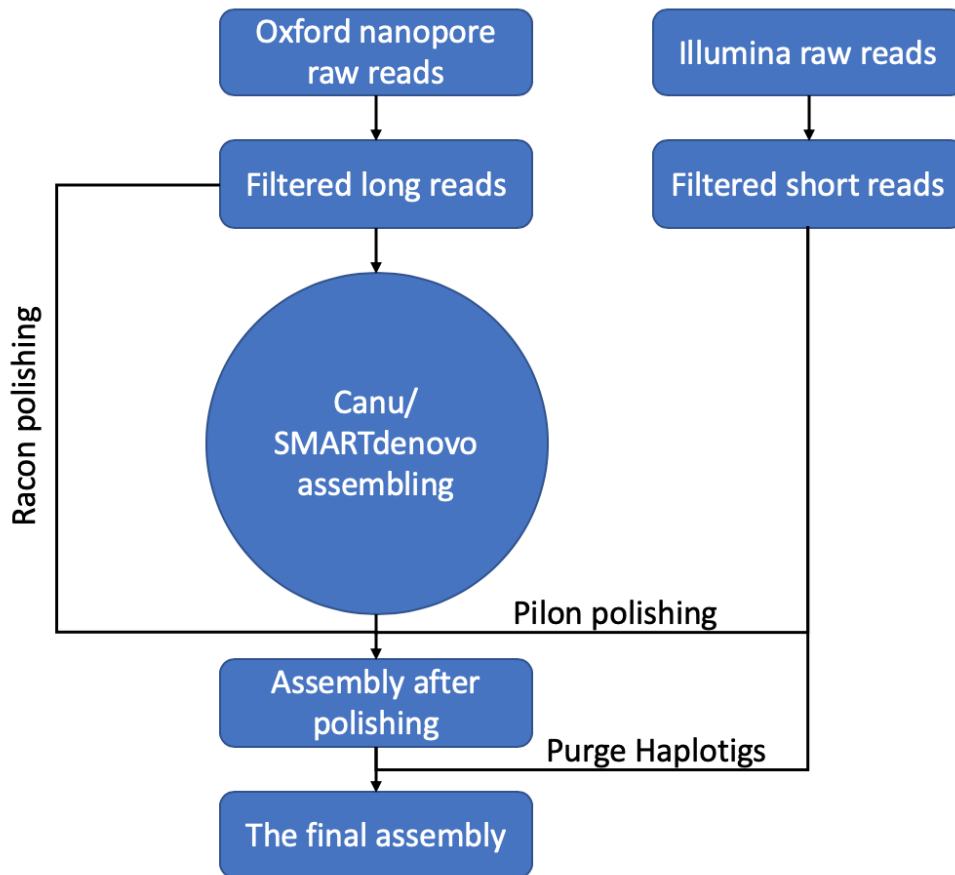

**Supplementary Fig. 5. Genome assembly flowchart demonstrating assembly polishing and data integration.**

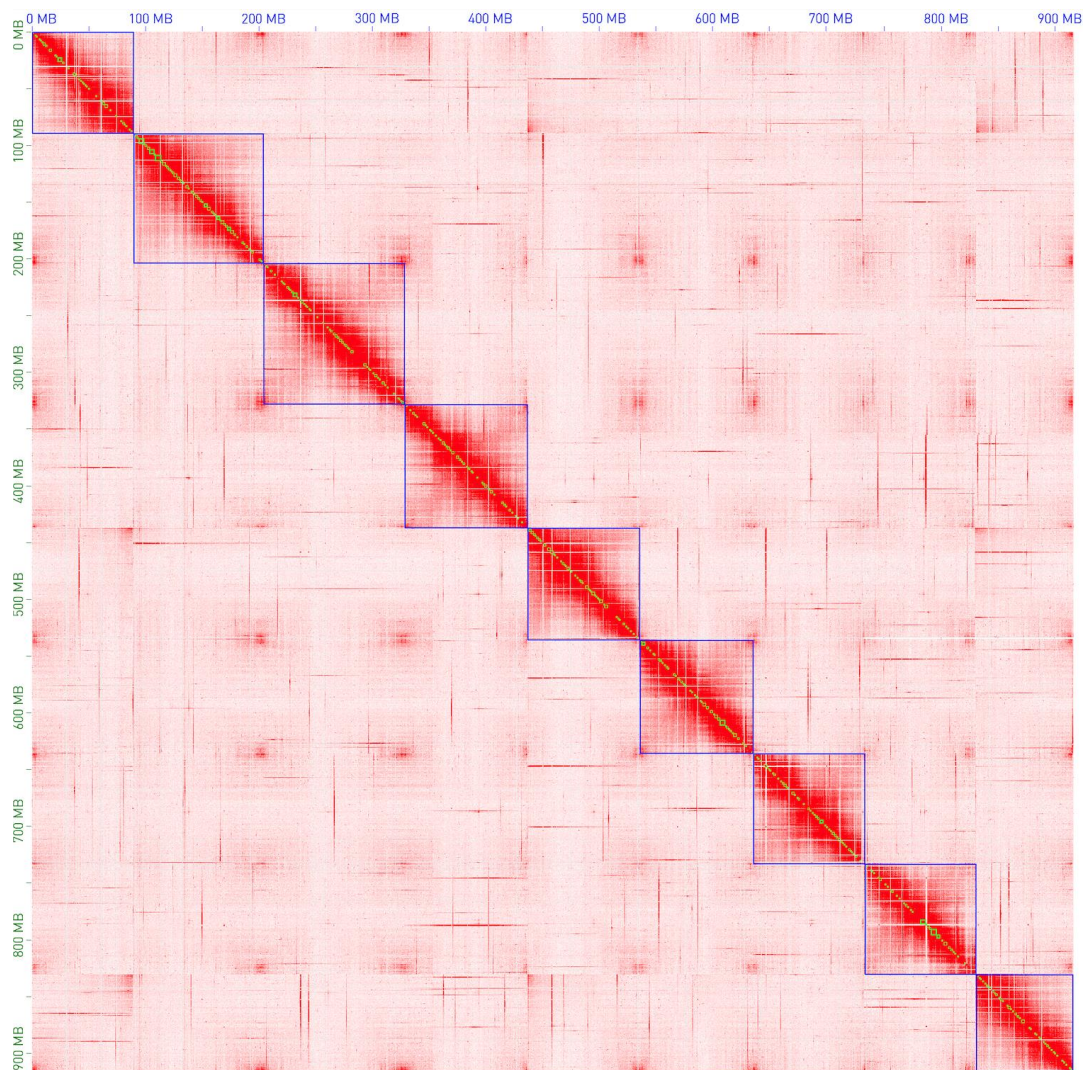

**Supplementary Fig. 6. The Hi-C map of *Coptis chinensis* genome assembly.**

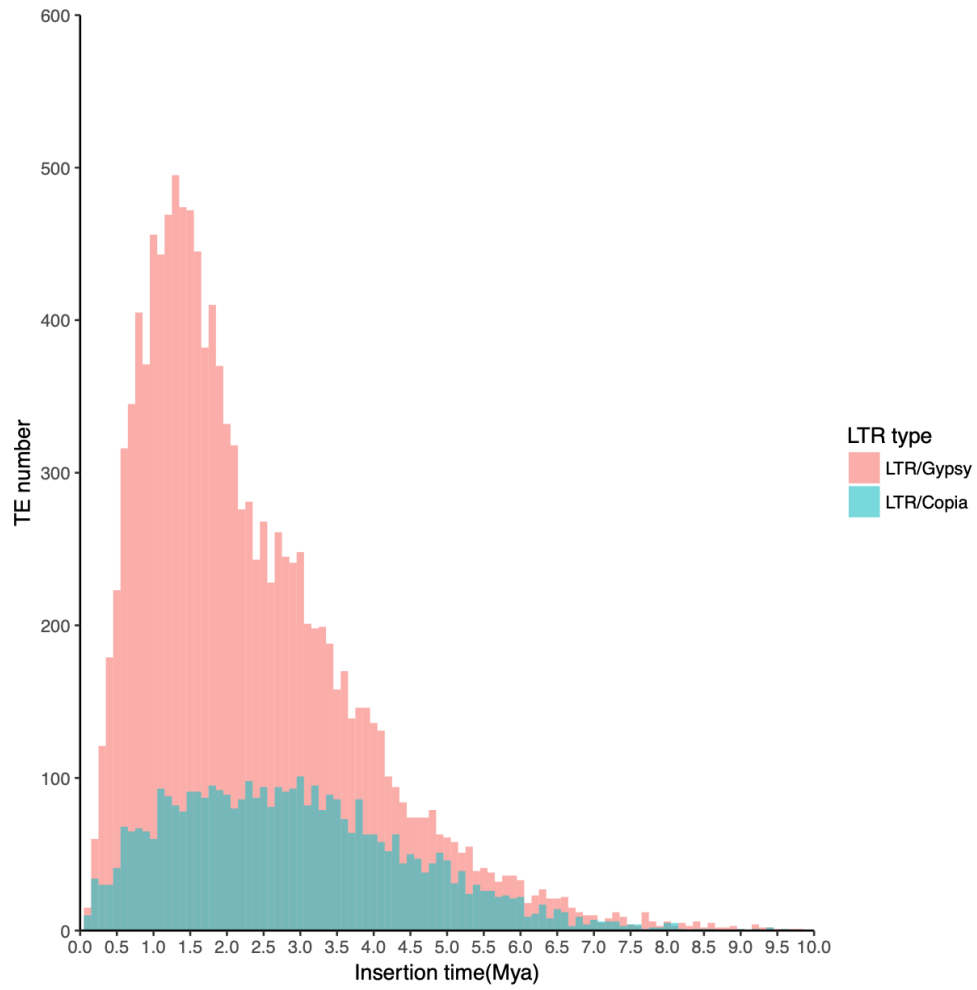

**Supplementary Fig. 7. Insertion burst of Gypsy and Copia retrotransposons in the *Coptis chinensis* genome.** TE, transposable element; LTR, long terminal repeat; Mya, million years ago.



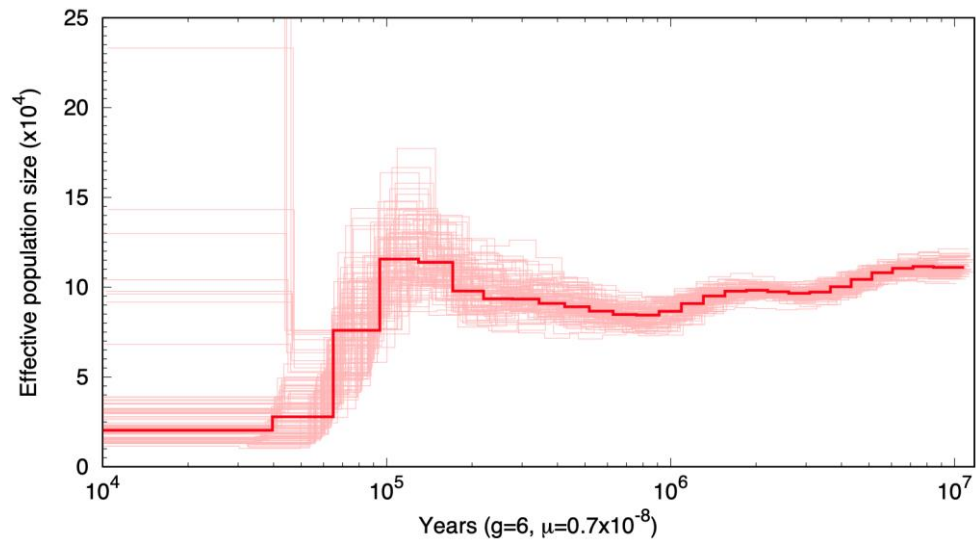

**Supplementary Fig. 8.** The history of effective population size of *Coptis chinensis* was inferred using the pairwise sequentially Markovian coalescent analysis.

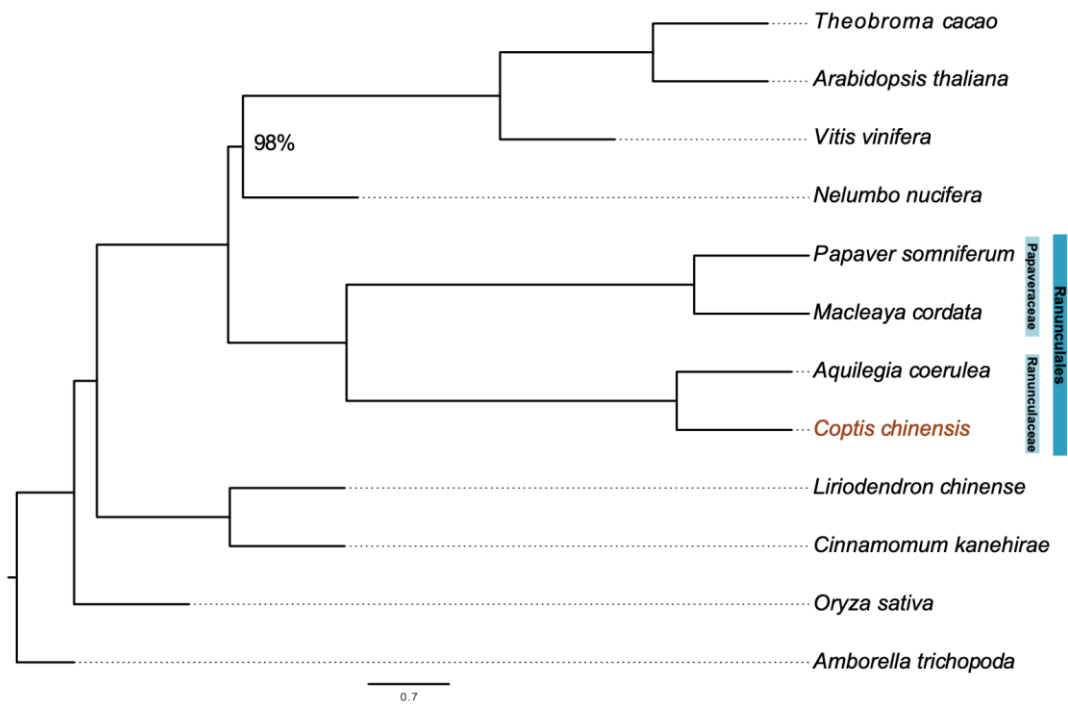

**Supplementary Fig. 9.** A species tree of 12 plant species on the basis of the coalescence of gene trees from 236 single copy orthologues using ASTRAL. All nodes with 100% support except denoted.

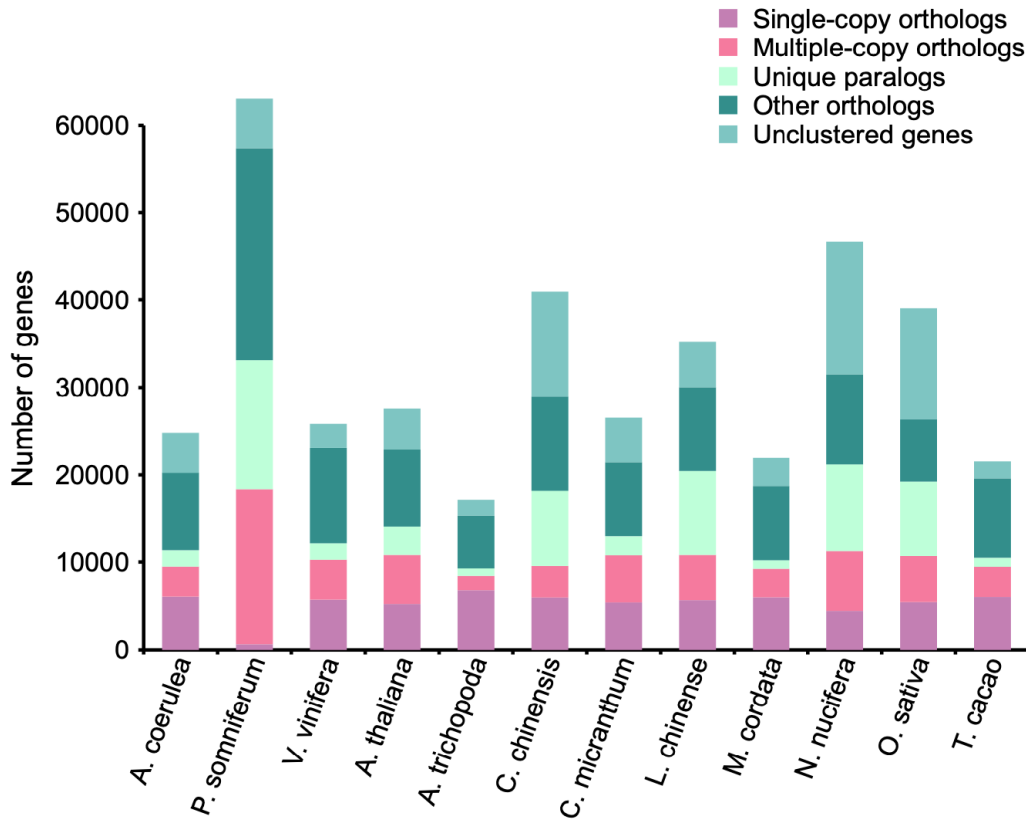

**Supplementary Fig. 10. Distribution of genes and gene families of plant species we investigated.** Source data are provided as a Source Data file.

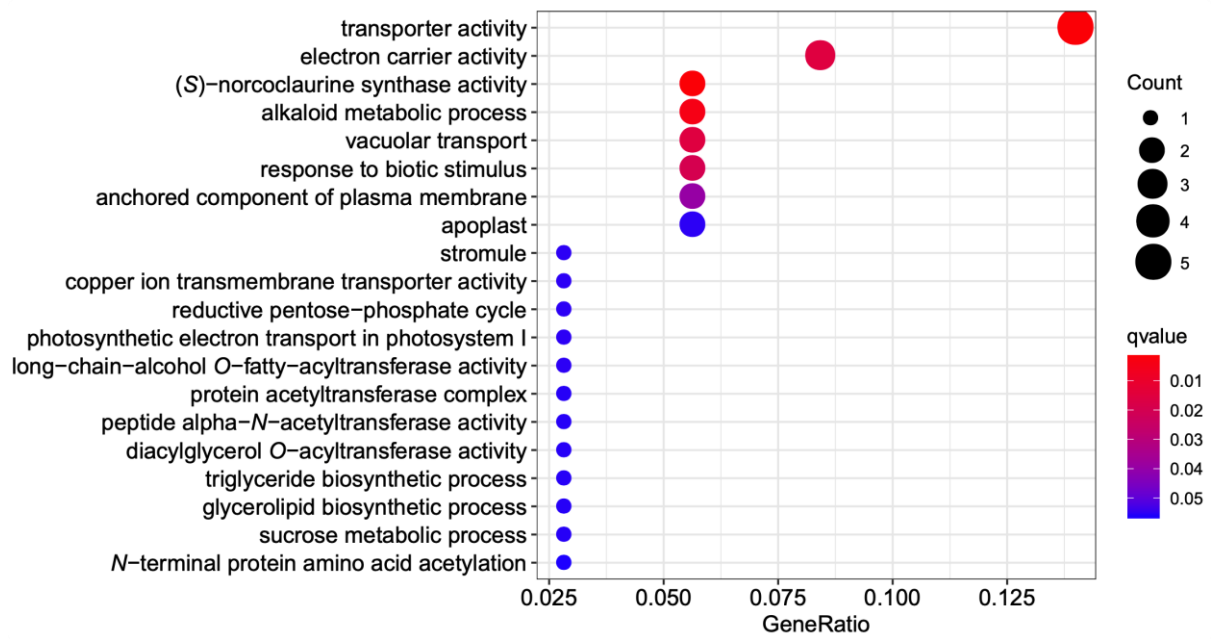

**Supplementary Fig. 11. Gene Ontology enrichment analysis of genes specifically presented in the Ranunculales clade.**

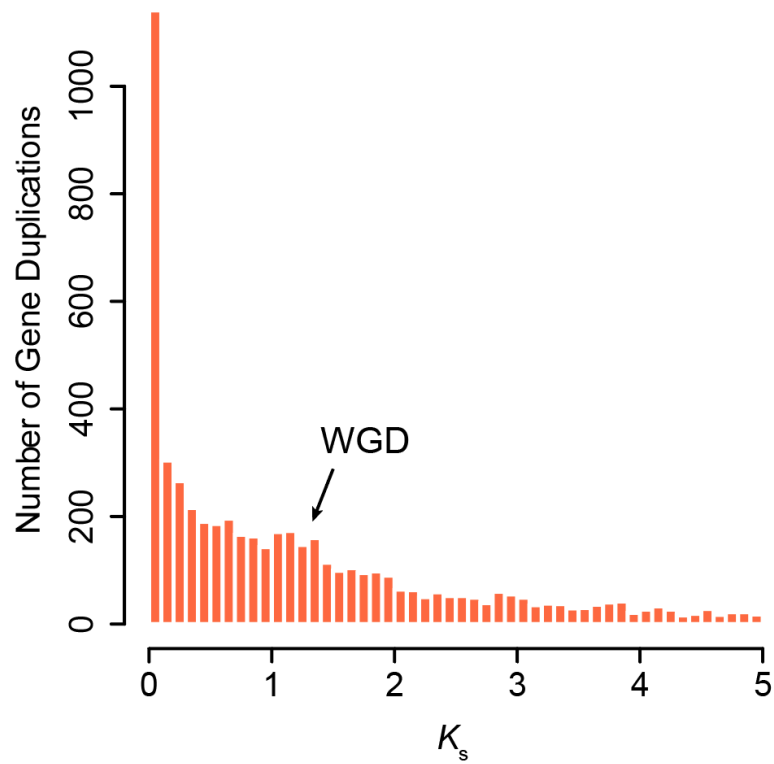

**Supplementary Fig. 12. Histogram distribution of synonymous divergence ( $K_s$ ) for duplicated genes of *Coptis teeta* (transcriptome data with  $k$ -mer= 35). A whole-genome duplication (WGD) event was indicated at about  $K_s = 1.08$ .**

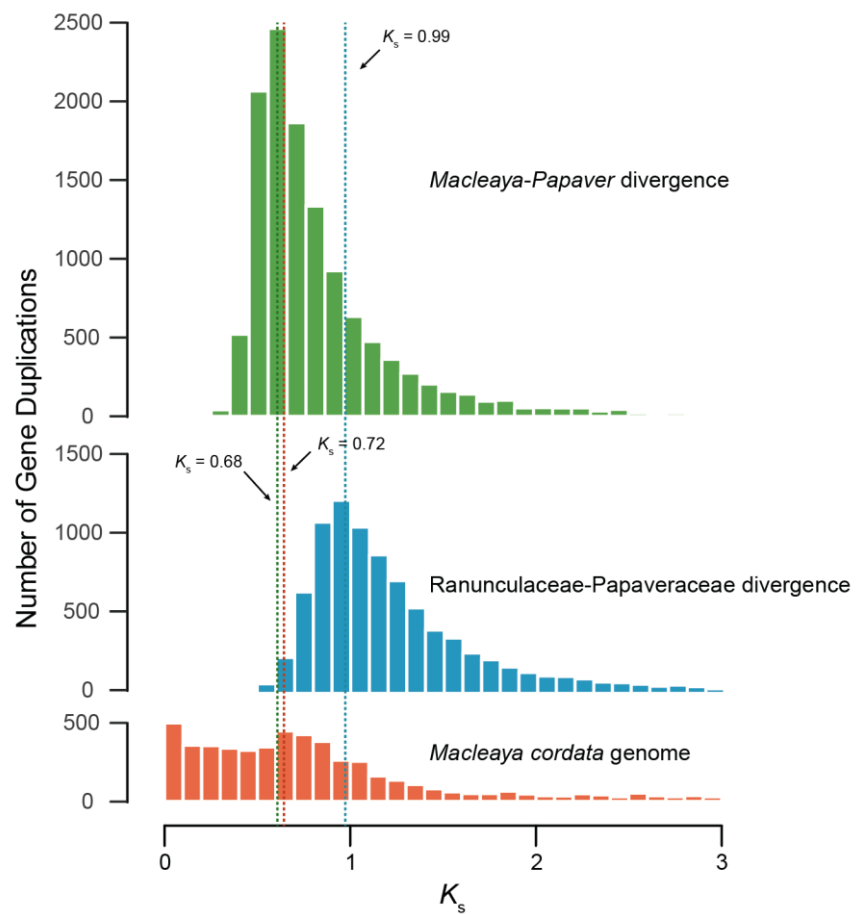

**Supplementary Fig. 13.  $K_s$  plots and ortholog divergence between *Coptis chinensis*, *Macleaya cordata* and *Papaver somniferum*.** A shared Papaveraceae whole-genome duplication event ( $K_s$  0.72) is found to be older than the *Macleaya* and *Papaver* divergence ( $K_s$  0.68), but predate the Ranunculaceae and Papaveraceae divergence ( $K_s$  0.99).

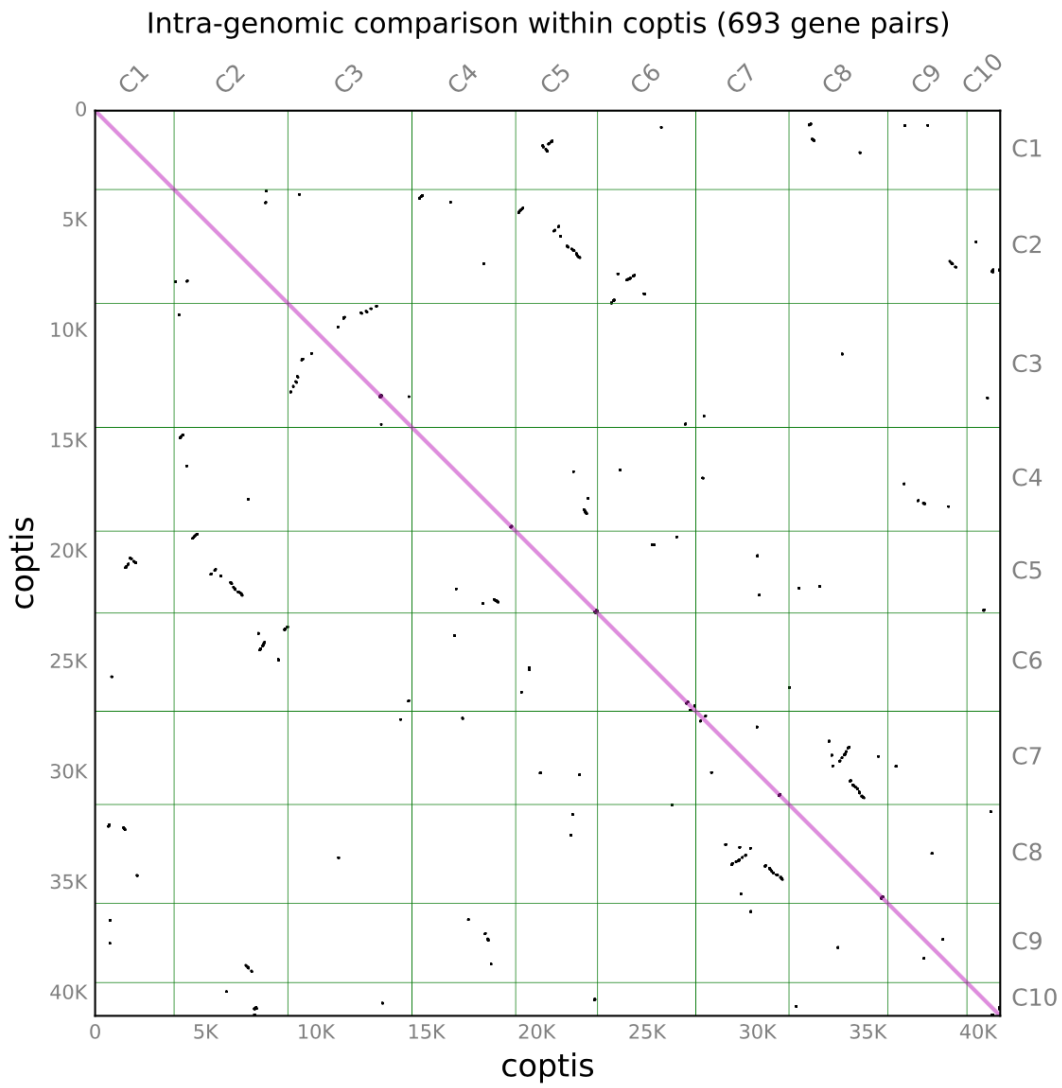

**Supplementary Fig. 14. Dotplot of syntenic blocks within the *Coptis chinensis* genome.** C1-C9 are nine chromosome-scale pseudomolecules, C10 is the set of unanchored contigs.

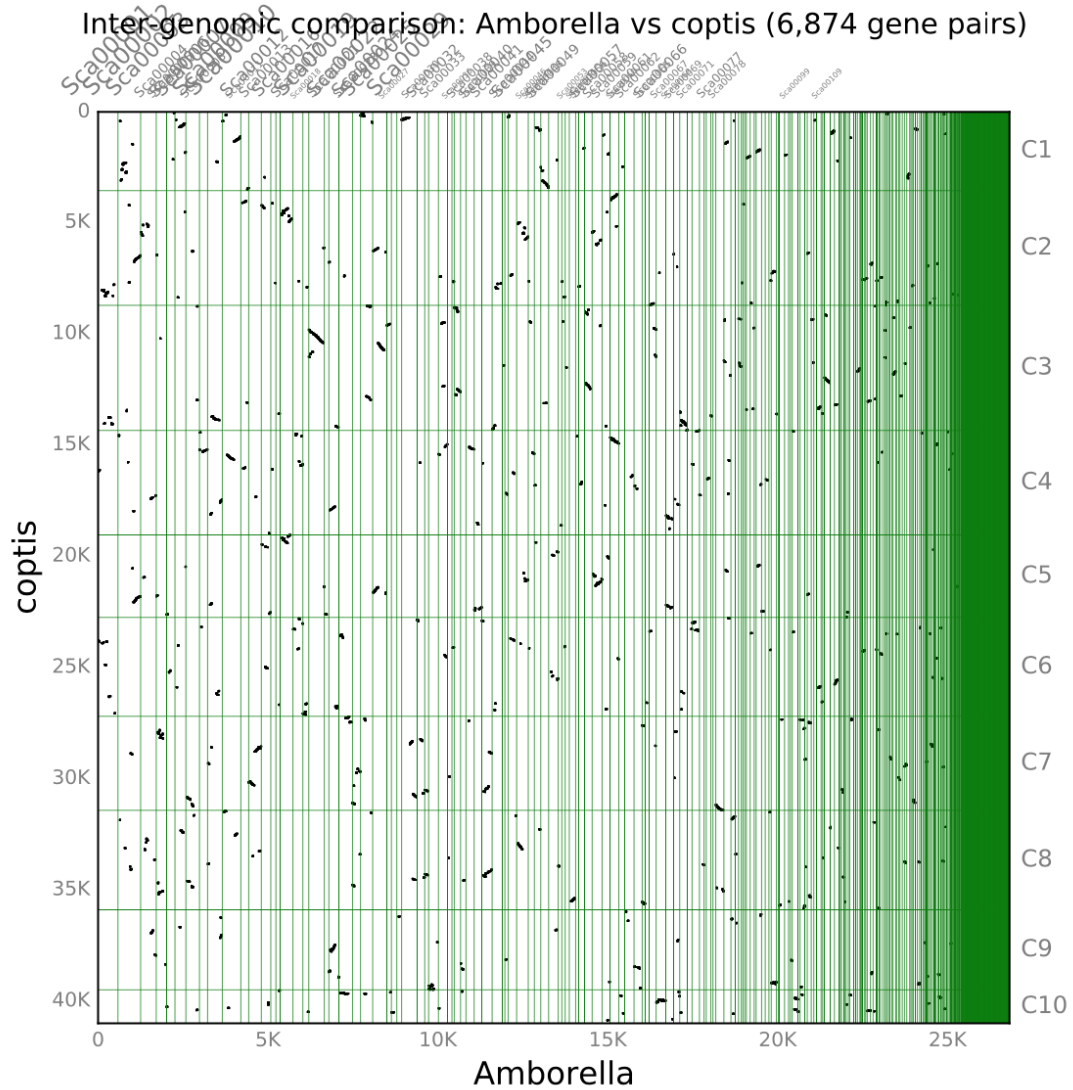

**Supplementary Fig. 15. Syntenic dotplot illustrating the comparative analysis of the *Coptis chinensis* and *Amborella trichopoda* genomes. C1-C9 are nine chromosome-scale pseudomolecules, C10 is the set of unanchored contigs of *C. chinensis* genome assembly.**



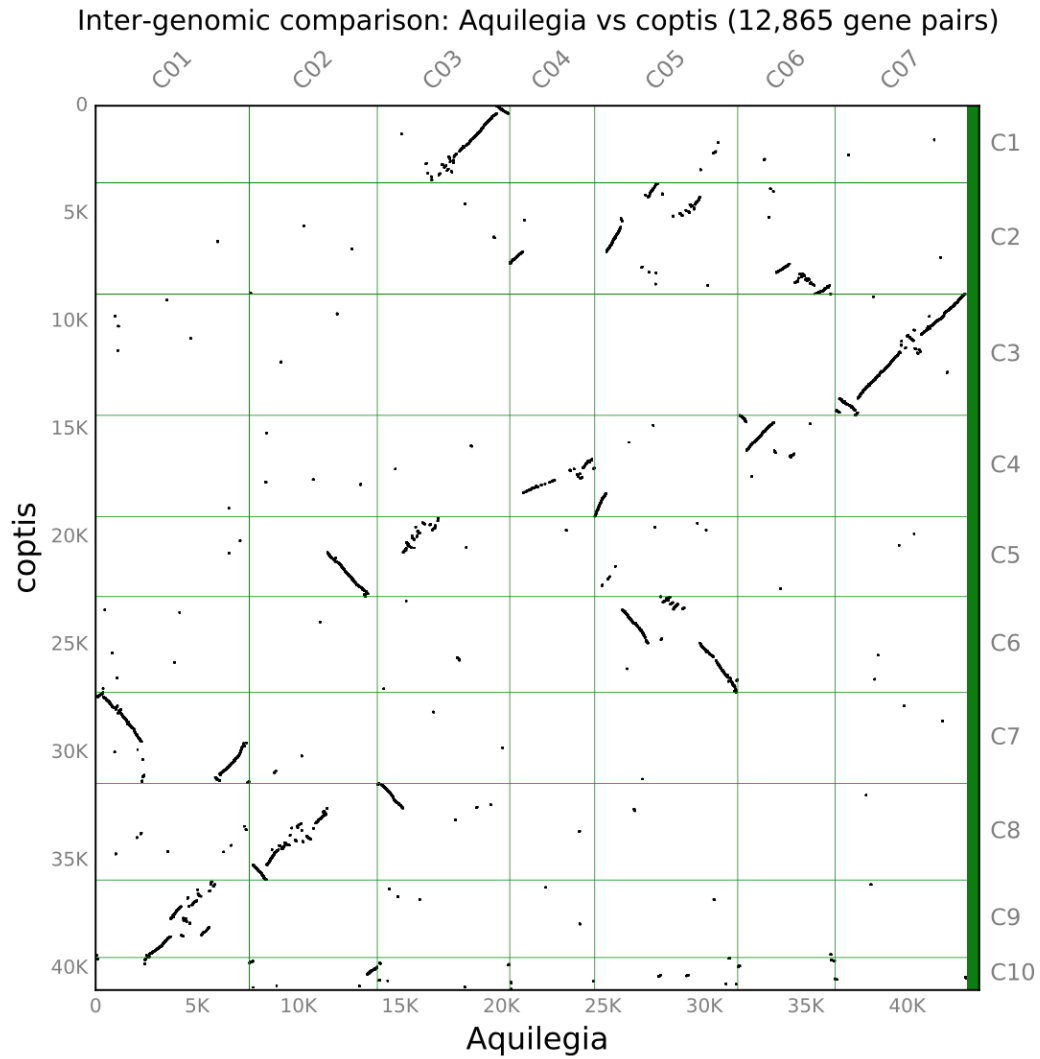

**Supplementary Fig. 16. Syntenic dotplot illustrating the comparative analysis of the *Coptis chinensis* and *Aquilegia coerulea* genomes. C1-C9 are nine chromosome-scale pseudomolecules, C10 is the set of unanchored contigs of *C. chinensis* genome assembly.**

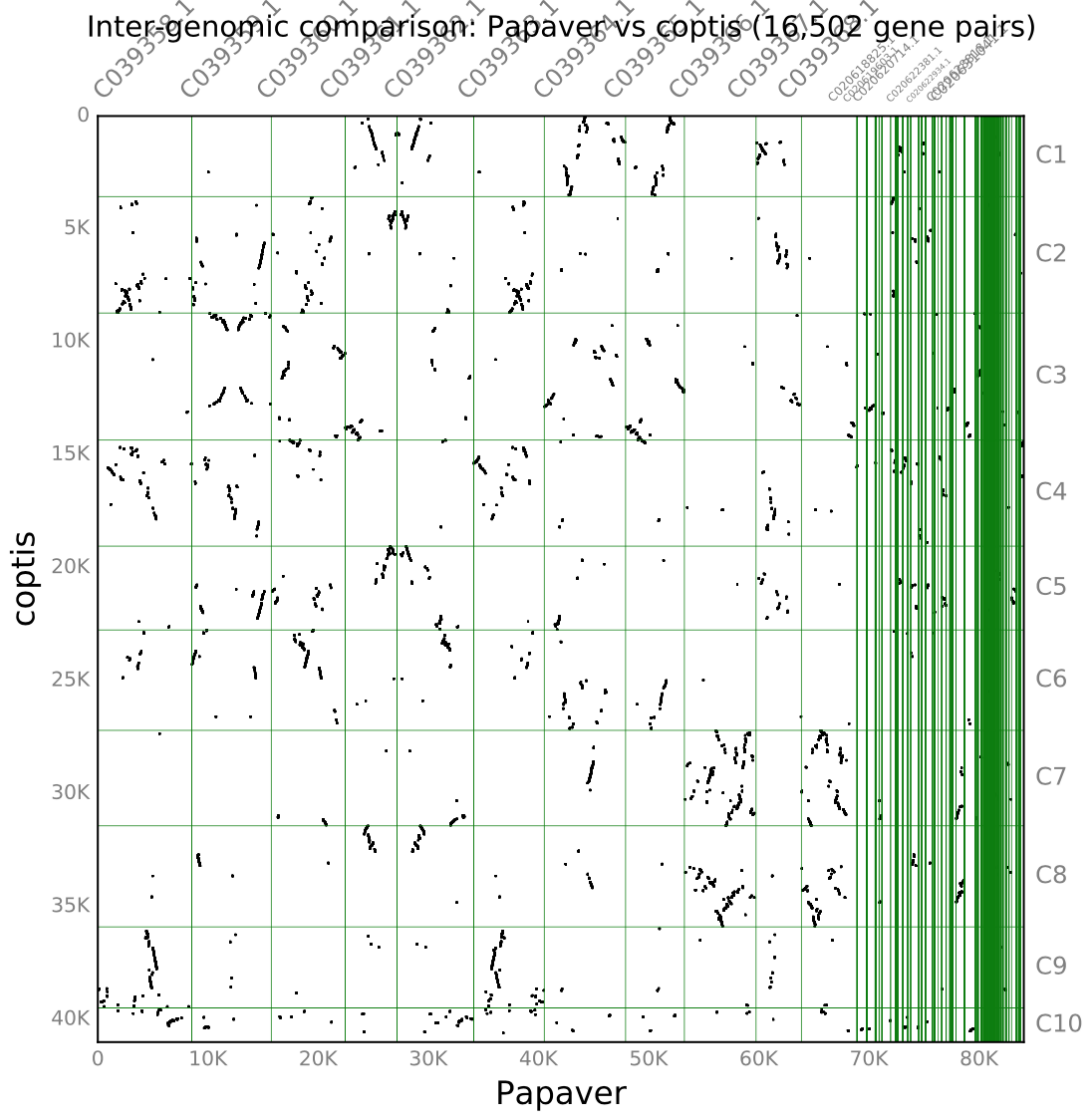

**Supplementary Fig. 17. Syntenic dotplot illustrating the comparative analysis of the *Coptis chinensis* and *Papaver somniferum* genomes. C1-C9 are nine chromosome-scale pseudomolecules, C10 is the set of unanchored contigs of *C. chinensis* genome assembly.**

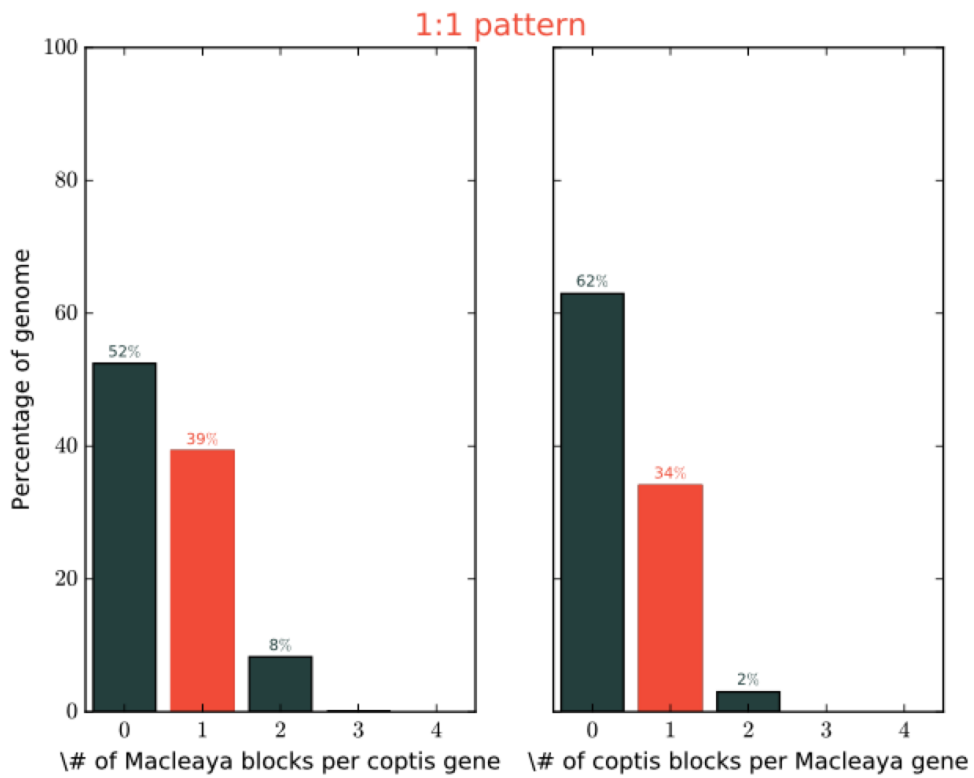

**Supplementary Fig. 18.** The syntenic depth ratio between the *Coptis chinensis* and *Macleaya cordata* genomes.

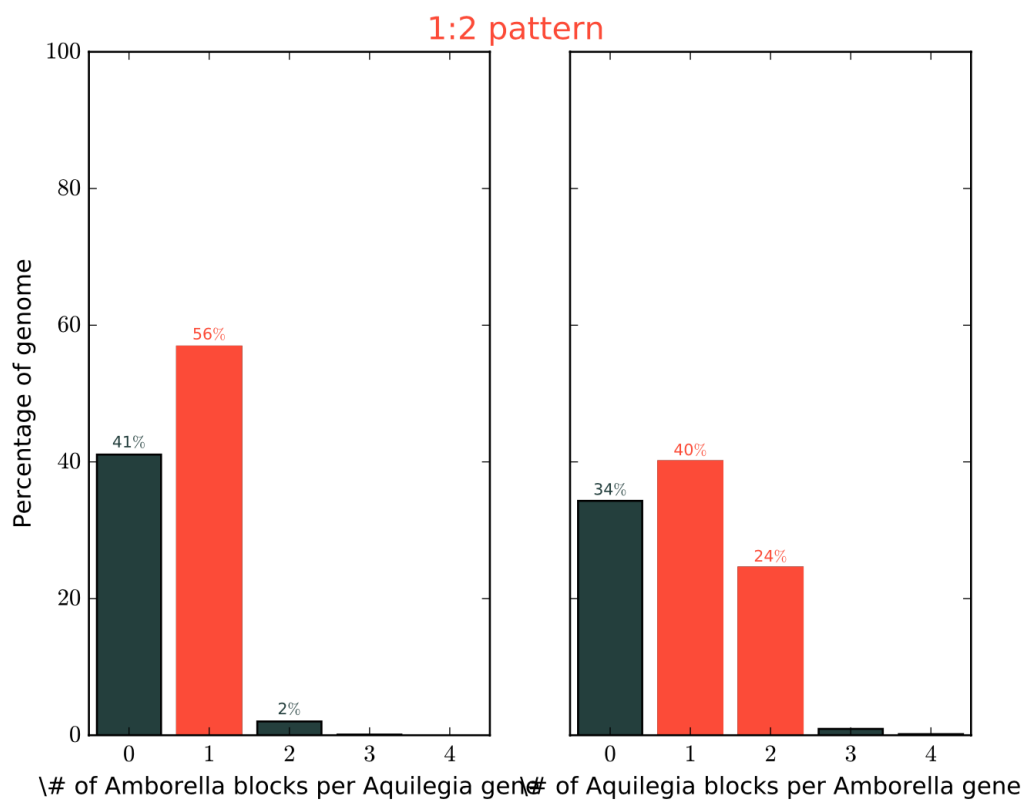

**Supplementary Fig. 19. The syntenic depth ratio between the *Aquilegia coerulea* and *Amborella trichopoda* genomes.**

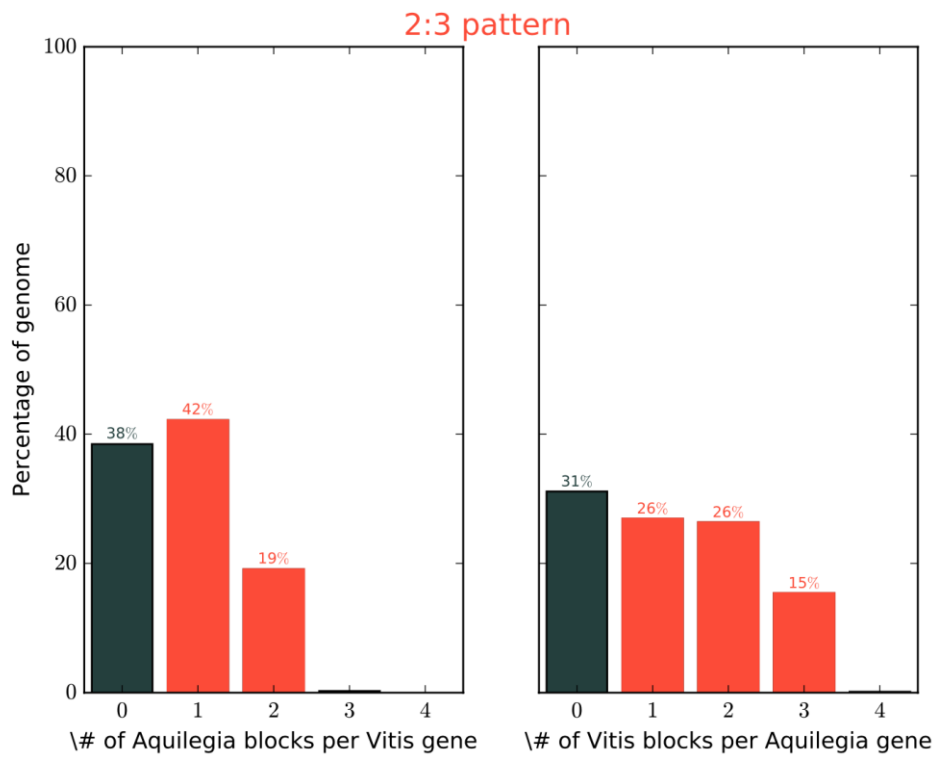

**Supplementary Fig. 20. The syntenic depth ratio between the *Aquilegia coerulea* and *Vitis vinifera* genomes.**

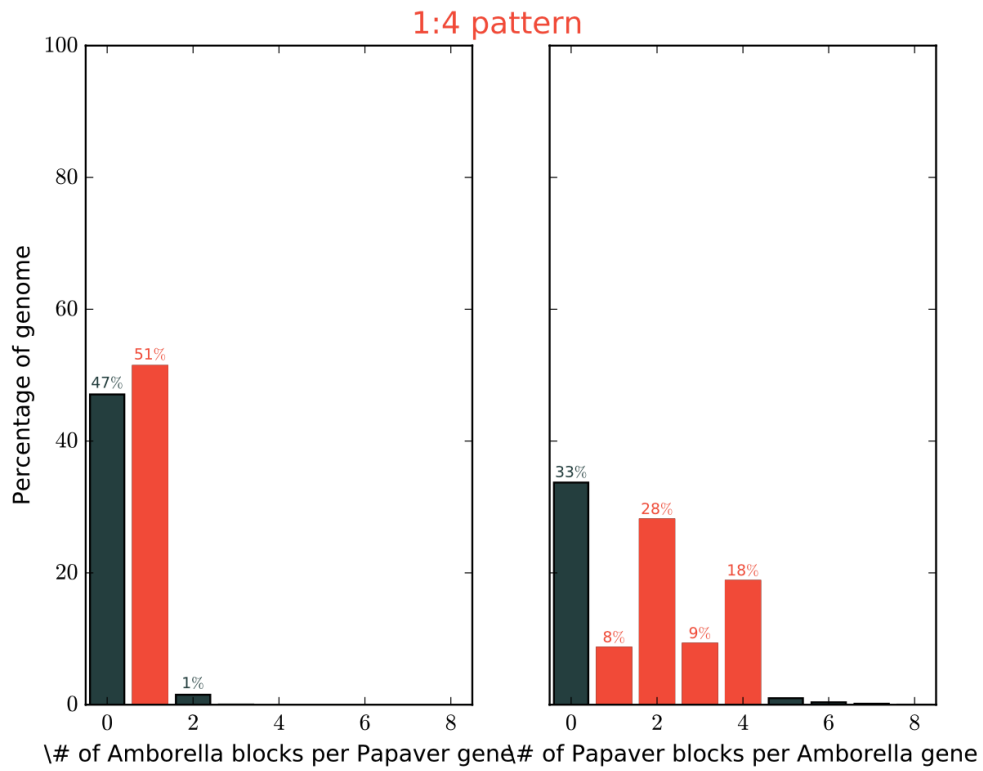

**Supplementary Fig. 21. The syntenic depth ratio between the *Papaver somniferum* and *Amborella trichopoda* genomes.**

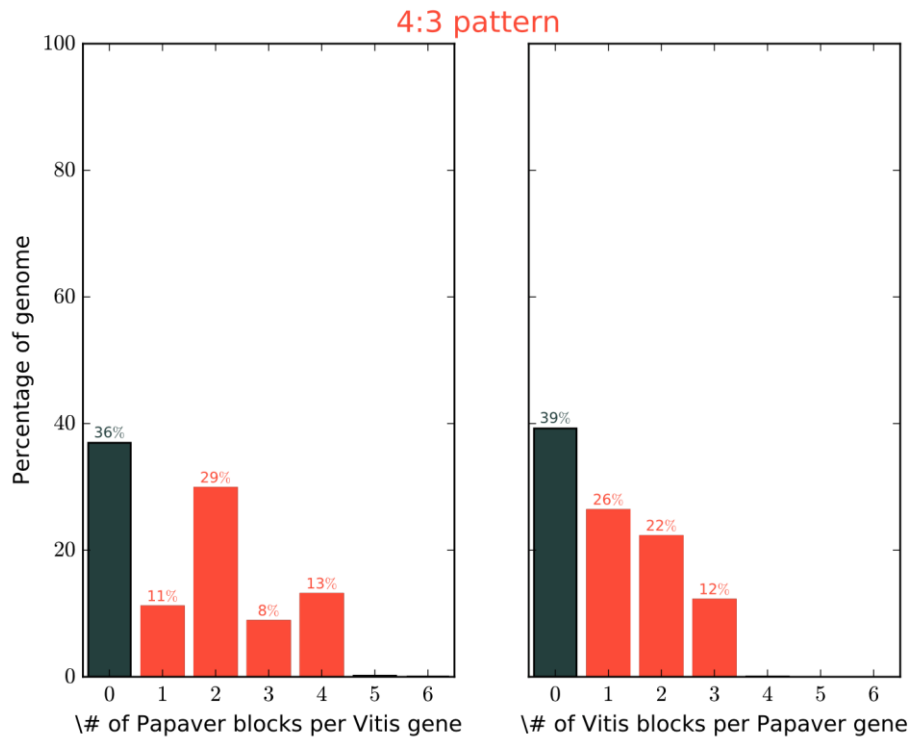

**Supplementary Fig. 22. The syntenic depth ratio between the *Papaver somniferum* and *Vitis vinifera* genomes.**

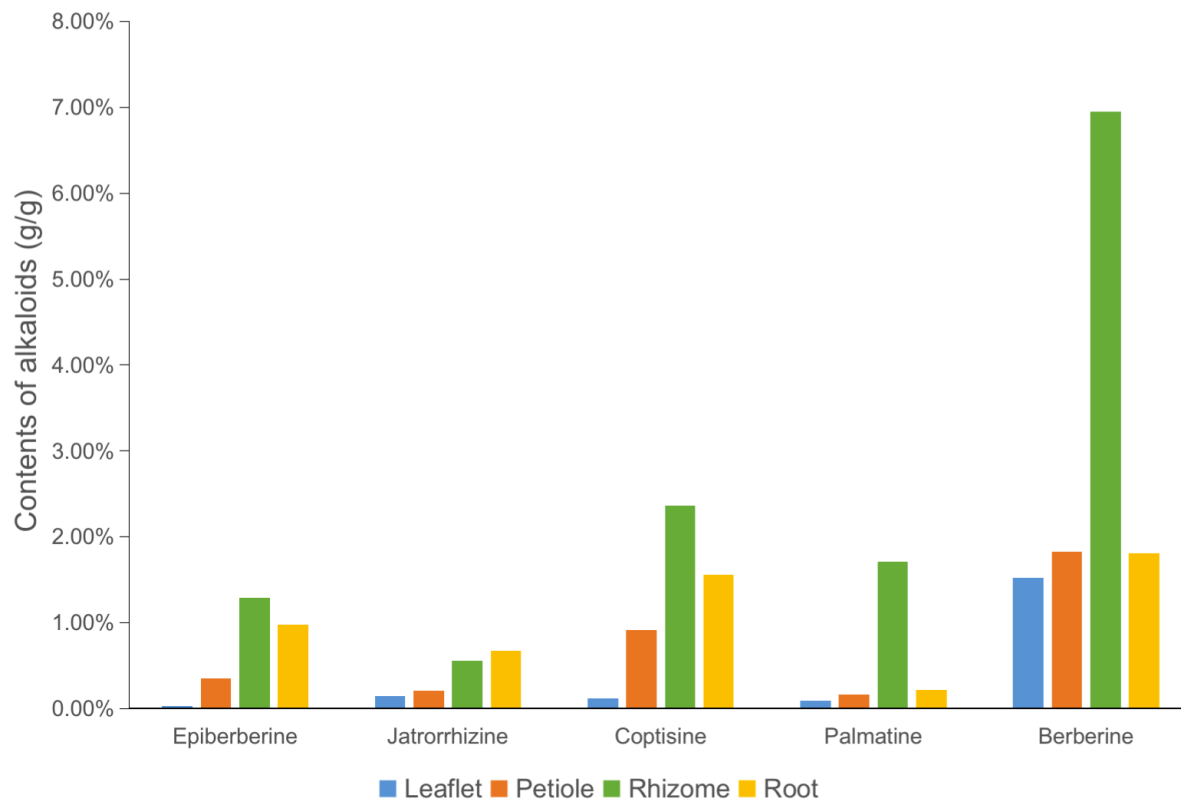

**Supplementary Fig. 23. The distribution of the identified benzylisoquinoline alkaloids in four different tissues of *Coptis chinensis*. Source data are provided as a Source Data file.**



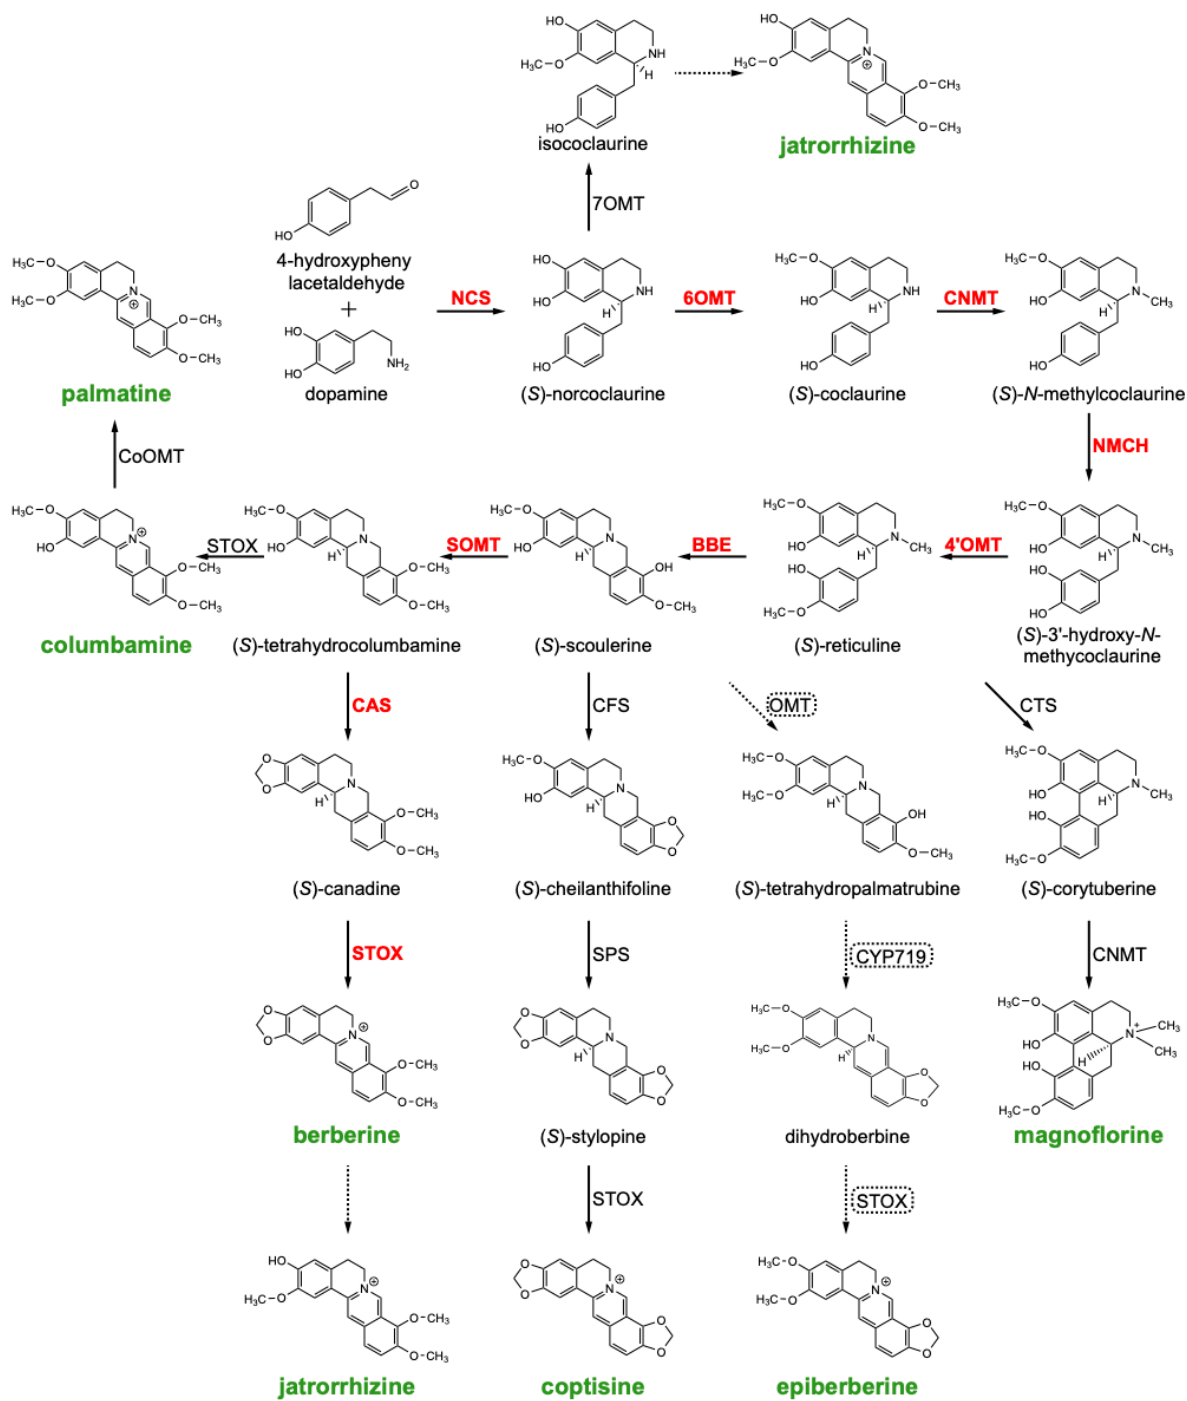

**Supplementary Fig. 24. Putative biosynthetic pathways of protoberberine-type alkaloids in *Coptis*.** Full names of enzymes were showed in Supplementary Data 5. The enzymes involved in the berberine pathway are marked in red and the suspected biosynthesis steps are indicated by dashed arrows.

Tree scale: 1

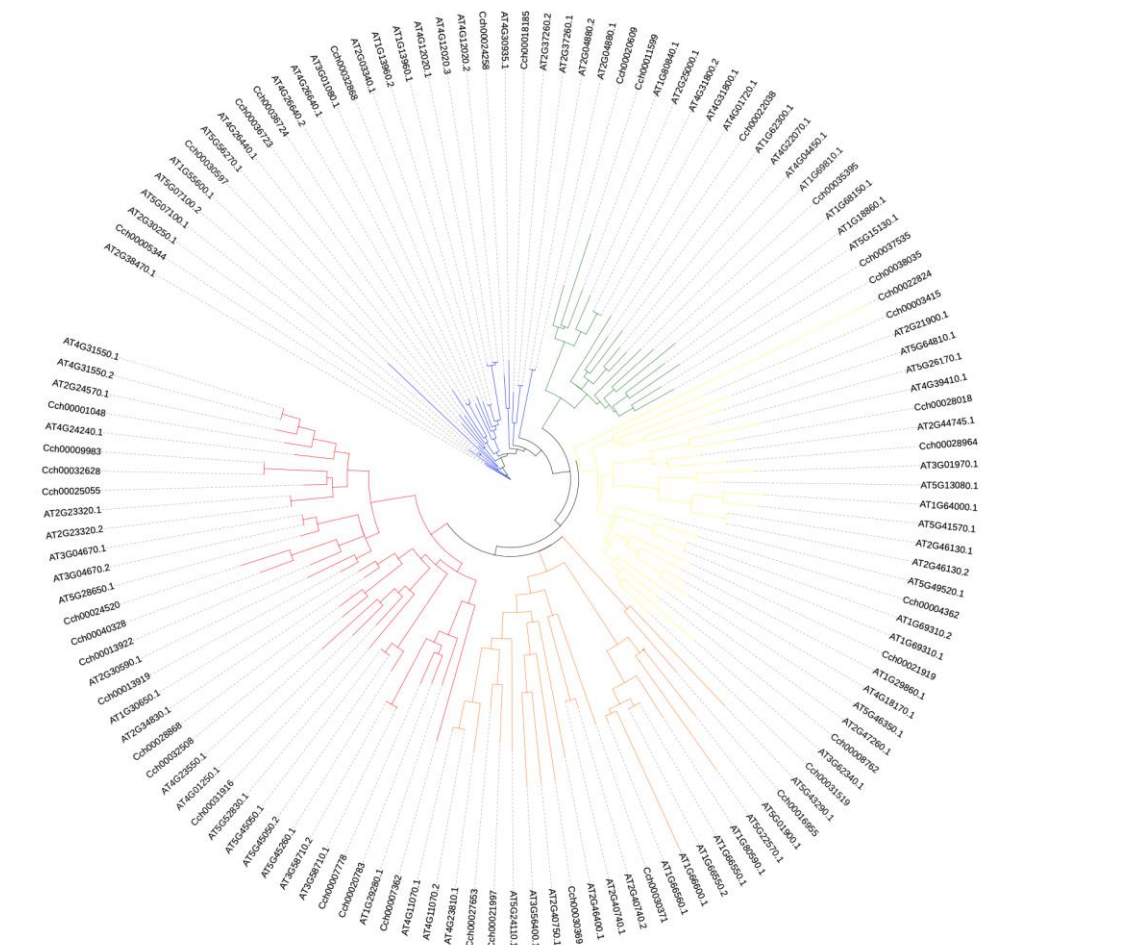

**Supplementary Fig. 25. The neighbor-joining tree of all WRKY genes identified in the *Coptis chinensis* genome.**



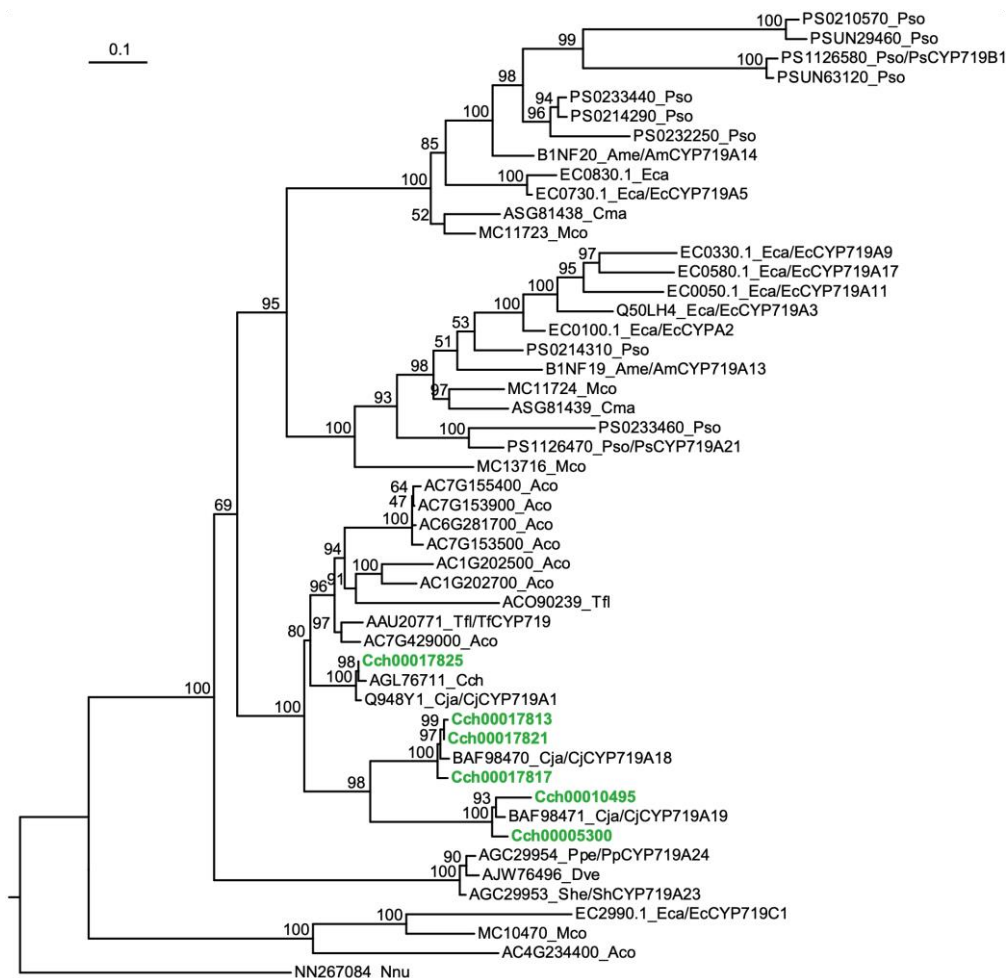

**Supplementary Fig. 27. A maximum-likelihood gene tree reflecting the evolutionary relationship of CYP719 members derived from different plant species.** The CYP719 genes from *Coptis chinensis* are marked in green. Other sequences are the same as those in the Figure 4 of Li et al. (2020) (Li Y., Winzer T., He Z., and Graham I.A. 2020. Over 100 Million Years of Enzyme Evolution Underpinning the Production of Morphine in the Papaveraceae Family of Flowering Plants. *Plant Comm.* 1, 100029). These sequences were collected from 13 plant taxa, including Cch: *C. chinensis*, Nnu: *Nelumbo nucifera*, Aco: *Aquilegia coerulea*, Ame: *Argemone mexicana*, Cma: *Chelidonium majus*, Cja: *C. japonica*, Dve: *Dysosma versipellis*, Eca: *Eschscholzia californica*, Mco: *Macleaya cordata*, Pso: *Papaver somniferum*, Ppe: *Podophyllum peltatum*, She: *Sinopodophyllum hexandrum*, Tfl: *Thalictrum flavum*.

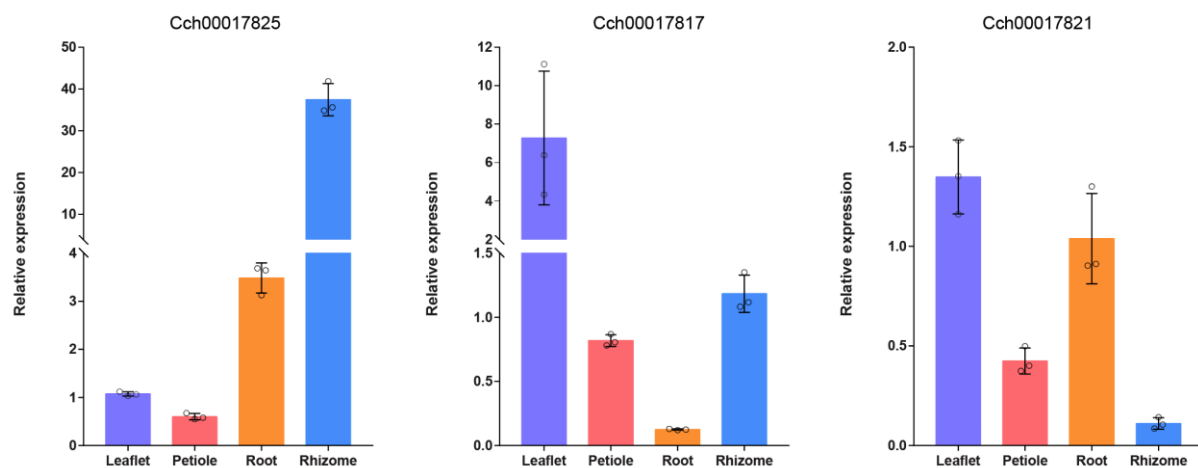

**Supplementary Fig. 28. qRT-PCR validation analysis of the three expressed CYP719 genes in our transcriptome sequencing of *Coptis chinensis*.** See Fig. 4b for the transcriptome derived gene expression profiles of these genes in four different tissues. Error bars, mean  $\pm$  s.d.. For each gene and tissue, n = 3 independent experiments were conducted. Source data are provided as a Source Data file.

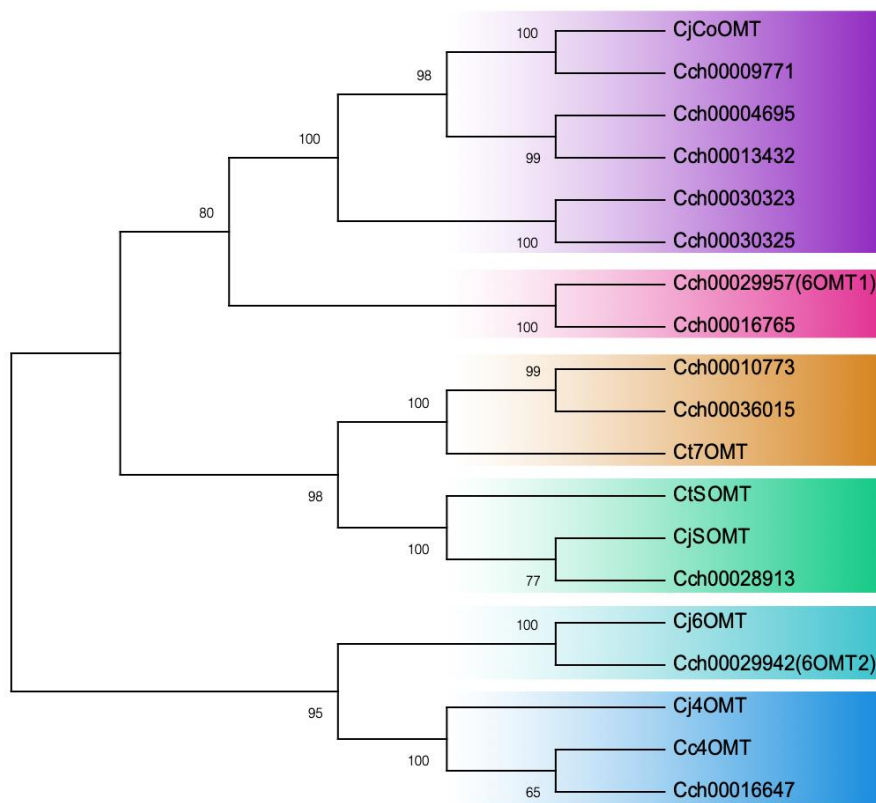

**Supplementary Fig. 29. The genetic relationships of genes encoding *O*-methyltransferase in *Coptis* plants.** The accession numbers for the sequences retrieved from NCBI web as follows: Cj6OMT: D29811.1; Cc6OMT1:MH165875.1; Cc6OMT2: MH165876.1; Ct7OMT: MH165877.1; CjSOMT: D29809.1; CtSOMT: MH165874.1; CjCoOMT: Q8H9A8.1; Cj4'OMT1: D29812.1; Cc4'OMT: EU236699.1.

**Supplementary Table 1. Summary of Illumina short reads used for assembling and polishing *Coptis chinensis* genome.**

| <b>Sample</b> | <b>Length</b> | <b>Raw reads</b> | <b>Clean reads</b> | <b>Raw base (G)</b> | <b>Clean base (G)</b> | <b>Q20(%)</b> | <b>Q30(%)</b> | <b>GC content (%)</b> |
|---------------|---------------|------------------|--------------------|---------------------|-----------------------|---------------|---------------|-----------------------|
| CC-1          | 150:150       | 144,683,821      | 144,463,456        | 43.41               | 43.34                 | 96.12         | 89.97         | 38.91                 |
| CC-2          | 150:150       | 219,168,494      | 218,653,822        | 65.75               | 65.60                 | 97.68         | 93.70         | 38.47                 |

**Supplementary Table 2. Statistics of the *Coptis chinensis* genome assembly.**

| <b>Assembly feature</b> | <b>Size (bp)</b> | <b>Number</b> |
|-------------------------|------------------|---------------|
| N90                     | 254,627          | 1,139         |
| N80                     | 379,804          | 840           |
| N70                     | 519,969          | 628           |
| N60                     | 655,482          | 469           |
| N50                     | 806,550          | 341           |
| Longest                 | 4,843,910        | /             |
| Total size              | 936,644,440      | /             |
| Total number            | /                | 1,801         |



**Supplementary Table 3. Length and scaffolds for chromosome-scale pseudomolecules.**

| <b>Pseudo-chromosome</b> | <b>Size (bp)</b> | <b>Contig number</b> |
|--------------------------|------------------|----------------------|
| Chr1                     | 89,969,453       | 1                    |
| Chr2                     | 114,376,183      | 1                    |
| Chr3                     | 124,611,609      | 1                    |
| Chr4                     | 108,390,809      | 1                    |
| Chr5                     | 98,746,328       | 1                    |
| Chr6                     | 100,393,100      | 1                    |
| Chr7                     | 97,188,538       | 1                    |
| Chr8                     | 97,686,796       | 1                    |
| Chr9                     | 85,171,767       | 1                    |
| unmapped                 | 20,109,857       | 108                  |

**Supplementary Table 4. Assembled transcripts used for validation and construction of the *Coptis chinensis* gene models.**

| Dataset | Number | Total length (bp) | Bases covered by assembly (%) | Sequences covered by assembly (%) | With >90% sequence in one scaffold |                | With >50% sequence in one scaffold |                |
|---------|--------|-------------------|-------------------------------|-----------------------------------|------------------------------------|----------------|------------------------------------|----------------|
|         |        |                   |                               |                                   | Number                             | Percentage (%) | Number                             | Percentage (%) |
| All     | 146661 | 174672120         | 92.3                          | 93.5                              | 91780                              | 62.6           | 130712                             | 89.1           |
| >200bp  | 146661 | 174672120         | 92.3                          | 93.5                              | 91780                              | 62.6           | 130712                             | 89.1           |
| >500bp  | 93595  | 157598341         | 93.5                          | 99.1                              | 61385                              | 65.6           | 88203                              | 94.2           |
| >1 kb   | 60616  | 133936940         | 93.8                          | 99.5                              | 41159                              | 67.9           | 57533                              | 94.9           |

**Supplementary Table 5. Assessing *Coptis chinensis* genome and annotation completeness with Benchmarking Universal Single-Copy Orthologs (BUSCO) analysis.**

| <b>BUSCO notation</b>           | <b>Number</b> | <b>Percent</b> |
|---------------------------------|---------------|----------------|
| Complete BUSCOs                 | 277           | 91.5%          |
| Complete and single-copy BUSCOs | 192           | 63.4%          |
| Complete and duplicated BUSCOs  | 85            | 28.1%          |
| Fragmented BUSCOs               | 21            | 6.9%           |
| Missing BUSCOs                  | 5             | 1.6%           |
| Total                           | 303           | 100%           |

**Supplementary Table 6. Statistics of genes annotated in the *Coptis chinensis* genome.**

| <b>Item</b>                             | <b>Number</b> |
|-----------------------------------------|---------------|
| The total number of genes               | 41,004        |
| The average mRNA length (bp)            | 3,571.75      |
| The average coding-sequence length (bp) | 968.89        |
| The average exons per gene              | 4.63          |
| The average exon length (bp)            | 209.38        |
| The total number of exons               | 189,743       |
| The average intron length (bp)          | 629.00        |
| The total number of introns             | 148,739       |
| The total intron length (bp)            | 93,556,632    |

**Supplementary Table 7. The annotated genes of *Coptis chinensis* which can be functionally classified in each corresponding database.**

| <b>Database</b> | <b>Number</b> | <b>Percentage</b> |
|-----------------|---------------|-------------------|
| InterPro        | 32,628        | 79.57%            |
| KEGG            | 33,836        | 82.52%            |
| NR              | 34,075        | 83.10%            |
| Uniprot         | 33,816        | 82.47%            |
| Total           | 35,748        | 87.18%            |

**Supplementary Table 8. Noncoding RNA genes annotated in the *Coptis chinensis* genome.**

| Type  | Copy number | Average length (bp) | Total length (bp) |
|-------|-------------|---------------------|-------------------|
| miRNA | 106         | 115.17              | 12,221            |
| tRNA  | 1,134       | 77.49               | 104,149           |
| rRNA  | 492         | 300.18              | 147,689           |
| snRNA | 1,429       | 111.26              | 158,986           |

**Supplementary Table 9. Statistics of repetitive element content in the *Coptis chinensis* genome.**

| <b>Item</b>    | <b>Subfamily</b> | <b>Number</b> | <b>Length (bp)</b> | <b>Coverage</b> |
|----------------|------------------|---------------|--------------------|-----------------|
| SINE           | /                | 260           | 20,271             | 0.00%           |
| LINE           | /                | 36,050        | 25,205,257         | 2.69%           |
| LTR            | /                | 264,701       | 384,363,878        | 41.04%          |
|                | Gypsy            | 214,086       | 332,392,923        | 35.49%          |
|                | Copia            | 47,274        | 50,382,058         | 5.38%           |
| DNA            | /                | 111,812       | 49,968,446         | 5.33%           |
| Satellite      | /                | 973           | 115,146            | 0.01%           |
| Simple repeat  | /                | 156,079       | 8,005,552          | 0.85%           |
| Low complexity | /                | 25,374        | 1,218,716          | 0.13%           |
| Other          | /                | 15,036        | 8,835,069          | 0.94%           |
| Unknown        | /                | 319,509       | 114,704,336        | 12.25%          |
| Total          | /                | 929,794       | 585,005,427        | 62.46%          |

**Supplementary Table 10. Plant genomes for phylogenetic and comparative genomics analyses.**

| <b>Plant taxon</b>           | <b>Short name</b>   | <b>Reference</b>                                                                                                                                                  |
|------------------------------|---------------------|-------------------------------------------------------------------------------------------------------------------------------------------------------------------|
| <i>Arabidopsis thaliana</i>  | <i>Arabidopsis</i>  | <a href="https://www.arabidopsis.org/">https://www.arabidopsis.org/</a>                                                                                           |
| <i>Theobroma cacao</i>       | cacao               | <a href="https://cocoa-genome-hub.southgreen.fr/">https://cocoa-genome-hub.southgreen.fr/</a>                                                                     |
| <i>Vitis vinifera</i>        | grape               | <a href="http://www.genoscope.cns.fr/externe/GenomeBrowser/Vitis/">http://www.genoscope.cns.fr/externe/GenomeBrowser/Vitis/</a>                                   |
| <i>Aquilegia coerulea</i>    | <i>Aquilegia</i>    | <a href="https://www.ncbi.nlm.nih.gov/Traces">https://www.ncbi.nlm.nih.gov/Traces</a>                                                                             |
| <i>Coptis chinensis</i>      | <i>Coptis</i>       | The present study                                                                                                                                                 |
| <i>Papaver somniferum</i>    | <i>Papaver</i>      | <a href="https://www.ncbi.nlm.nih.gov/bioproject/PRJNA435796">https://www.ncbi.nlm.nih.gov/bioproject/PRJNA435796</a>                                             |
| <i>Macleaya cordata</i>      | <i>Macleaya</i>     | <a href="https://www.ncbi.nlm.nih.gov/nuccore/MVGT00000000.1/">https://www.ncbi.nlm.nih.gov/nuccore/MVGT00000000.1/</a>                                           |
| <i>Nelumbo nucifera</i>      | lotus               | <a href="http://nelumbo.biocloud.net">http://nelumbo.biocloud.net</a>                                                                                             |
| <i>Cinnamomum kanehirae</i>  | <i>Cinnamomum</i>   | <a href="https://www.ncbi.nlm.nih.gov/bioproject/?term=PRJNA477266">https://www.ncbi.nlm.nih.gov/bioproject/?term=PRJNA477266</a>                                 |
| <i>Liriodendron chinense</i> | <i>Liriodendron</i> | <a href="https://www.ncbi.nlm.nih.gov/bioproject/PRJNA418360">https://www.ncbi.nlm.nih.gov/bioproject/PRJNA418360</a>                                             |
| <i>Oryza sativa</i>          | rice                | <a href="http://rice.plantbiology.msu.edu/">http://rice.plantbiology.msu.edu/</a>                                                                                 |
| <i>Amborella trichopoda</i>  | <i>Amborella</i>    | <a href="https://genomevolution.org/CoGe/SearchResults.pl?s=amborella&amp;p=genome">https://genomevolution.org/CoGe/SearchResults.pl?s=amborella&amp;p=genome</a> |



**Supplementary Table 11. Comparisons of genes and gene families among plant species investigated.**

| <b>Species</b>      | <b>Genes number</b> | <b>Genes in families</b> | <b>Unclustered genes</b> | <b>Family number</b> | <b>Unique families</b> | <b>Average genes per family</b> |
|---------------------|---------------------|--------------------------|--------------------------|----------------------|------------------------|---------------------------------|
| <i>Arabidopsis</i>  | 27,562              | 22,863                   | 4,699                    | 14,044               | 954                    | 1.63                            |
| Cacao               | 21,518              | 19,592                   | 1,926                    | 14,814               | 310                    | 1.32                            |
| Grape               | 25,834              | 23,104                   | 2,730                    | 15,038               | 480                    | 1.54                            |
| <i>Aquilegia</i>    | 24,823              | 20,232                   | 4,591                    | 14,619               | 622                    | 1.38                            |
| <i>Coptis</i>       | 41,004              | 28,926                   | 12,078                   | 15,984               | 2,397                  | 1.81                            |
| <i>Papaver</i>      | 63,018              | 57,315                   | 5,703                    | 17,043               | 2,911                  | 3.36                            |
| <i>Macleaya</i>     | 21,911              | 18,740                   | 3,171                    | 14,278               | 319                    | 1.31                            |
| Lotus               | 46,712              | 31,474                   | 15,238                   | 15,610               | 1,595                  | 2.02                            |
| <i>Cinnamomum</i>   | 26,531              | 21,411                   | 5,120                    | 13,440               | 631                    | 1.59                            |
| <i>Liriodendron</i> | 35,269              | 30,040                   | 5,229                    | 13,606               | 891                    | 2.21                            |
| Rice                | 39,049              | 26,341                   | 12,708                   | 14,189               | 2,329                  | 1.86                            |
| <i>Amborella</i>    | 17,106              | 15,298                   | 1,808                    | 12,898               | 269                    | 1.19                            |

**Supplementary Table 12. The identified peaks by the mixture model on the gene age distribution ( $K_s$ ) of different species genomic data.**

| # | Species                               | Family        | Median $K_s$ 1 | WGD 1         | Median $K_s$ 2 | WGD 2        |
|---|---------------------------------------|---------------|----------------|---------------|----------------|--------------|
| 1 | <i>Aquilegia coerulea</i>             | Ranunculaceae | 0.9026         | AQCO $\alpha$ |                |              |
| 2 | <i>Coptis chinensis</i> genome        | Ranunculaceae | 1.083          | AQCO $\alpha$ |                |              |
| 3 | <i>Coptis chinensis</i> transcriptome | Ranunculaceae | 1.043          | AQCO $\alpha$ |                |              |
| 4 | <i>Coptis teeta</i> transcriptome     | Ranunculaceae | 1.123          | AQCO $\alpha$ |                |              |
| 5 | <i>Papaver somniferum</i>             | Papaveraceae  | 0.0834         | PASO $\alpha$ | 1.3168         | PASO $\beta$ |
| 6 | <i>Macleaya cordata</i>               | Papaveraceae  | 0.7152         | PASO $\beta$  |                |              |
| 7 | <i>Nelumbo nucifera</i>               | Nelumbonaceae | 0.4668         | NENU $\alpha$ |                |              |

**Supplementary Table 13. The ortholog divergence between different species genome pairs investigated.**

| # | Taxon 1                   | Taxon 2                   | Mean   | Median | SD     | Minimum $K_s$ ortholog divergence | Maximum $K_s$ ortholog divergence |
|---|---------------------------|---------------------------|--------|--------|--------|-----------------------------------|-----------------------------------|
| 1 | <i>Aquilegia coerulea</i> | <i>Coptis chinensis</i>   | 0.6819 | 0.6708 | 0.1438 | 0.0001                            | 1                                 |
| 2 | <i>Aquilegia coerulea</i> | <i>Papaver somniferum</i> | 1.3575 | 1.3225 | 0.2916 | 0.7                               | 2                                 |
| 3 | <i>Coptis chinensis</i>   | <i>Nelumbo nucifera</i>   | 1.3209 | 1.2313 | 0.4017 | 0.5                               | 2.5                               |
| 4 | <i>Nelumbo nucifera</i>   | <i>Papaver somniferum</i> | 1.4257 | 1.3422 | 0.4015 | 0.5                               | 2.5                               |
| 5 | <i>Papaver somniferum</i> | <i>Coptis chinensis</i>   | 1.4587 | 1.3848 | 0.4089 | 0.5                               | 2.5                               |
| 6 | <i>Macleaya cordata</i>   | <i>Papaver somniferum</i> | 0.7220 | 0.6761 | 0.2098 | 0.1                               | 1.3                               |
| 7 | <i>Macleaya cordata</i>   | <i>Coptis chinensis</i>   | 1.0123 | 0.9882 | 0.2213 | 0.5                               | 1.5                               |
| 8 | <i>Macleaya cordata</i>   | <i>Aquilegia coerulea</i> | 1.0175 | 0.9959 | 0.2178 | 0.0001                            | 1.5                               |

**Supplementary Table 14. The primers used for qRT-PCR validation analysis.**

| <b>Gene ID</b>    | <b>Primer name</b>  | <b>Primer sequence (5' to 3')</b> |
|-------------------|---------------------|-----------------------------------|
| Cch00017825       | 825-F               | TGGTGAGGCCACTTCTCTCT              |
|                   | 825-R               | TCTTGTGCTCCTTGTTACAG              |
| Cch00017821       | 821-F               | TGGATTTGTTATTGATTGATGCT           |
|                   | 821-R               | AATAAGCCATAGAAAACCTCCCCT          |
| Cch00017817       | 817-F               | AGAGTTGGAGAGGTCCCGTTA             |
|                   | 817-R               | TAATAATTAGTTGTTTAGCTT             |
| Cc $\beta$ -Actin | Cc $\beta$ -Actin-F | GTCACACCGTCCCCATTTA               |
|                   | Cc $\beta$ -Actin-R | GTCACGGACGATTTCTCGTT              |
